# Supplementary material for: Albumin in patients with ARDS in ICU: a retrospective study from eICU and MIMIC-III database
Source: Research Square preprint supplement (doi:10.21203/rs.3.rs-6948848/v1), 2025-07-28
Supplement: Supplementary file 1 [file 222e1030f3c07e1ddf65c180.docx]

**Table S1a: Baseline Characteristics between the IPTW cohort from eICU database.**

| Variables | total (n=6519.81) | non-albumin(n=3371.46) | albumin(n=3148.34) | p | SMD |
| --- | --- | --- | --- | --- | --- |
| age (median [IQR]) | 66.00 [54.00, 77.00] | 67.00 [56.00, 79.00] | 65.00 [51.00, 75.00] | 0.08 | 0.17 |
| female (%) | 3217.04 (49.34) | 1669.18 (49.51) | 1547.87 (49.16) | 0.94 | 0.01 |
| **Admission source (%)** |  |  |  | 0.01 | 0.29 |
| Medical | 5374.10 (82.43) | 2939.20 (87.18) | 2434.90 (77.34) |  |  |
| Surgical urgent | 666.40 (10.22) | 209.45 (6.21) | 456.94 (14.51) |  |  |
| Surgical elective | 479.31 (7.35) | 222.82 (6.61) | 256.49 (8.15) |  |  |
| **Ethnicity (%)** |  |  |  | 0.6 | 0.16 |
| White | 4862.85 (74.59) | 2536.77 (75.24) | 2326.08 (73.88) |  |  |
| Black | 720.81 (11.06) | 412.21 (12.23) | 308.60 (9.80) |  |  |
| Hispanic | 370.54 (5.68) | 192.59 (5.71) | 177.95 (5.65) |  |  |
| Other | 469.58 (7.20) 565.62 (8.67) | 182.37 (5.41) 229.9 (6.82) | 287.21 (9.12) 335.72 (10.66) |  |  |
| Weight (median [IQR]) | 81.60 [66.70, 99.37] | 81.60 [65.80, 100.48] | 80.11 [67.28, 96.07] | 0.79 | 0.06 |
| Mechanical ventilation (%) | 4654.88 (71.40) | 2347.45 (69.63) | 2307.43 (73.29) | 0.38 | 0.08 |
| SOFA (median [IQR]) | 7.00 [5.00, 9.00] | 6.00 [4.00, 9.00] | 7.00 [6.00, 9.00] | 0.01 | 0.2 |
| APACHE IVa (median [IQR]) | 62.00 [50.00, 82.00] | 62.00 [47.00, 82.00] | 61.00 [51.00, 81.00] | 0.33 | 0.09 |
| P/F (median [IQR]) | 140.00 [92.36, 208.75] | 138.33 [94.00, 208.00] | 142.80 [90.73, 210.48] | 0.96 | 0.01 |
| Urine output (median [IQR]) | 1750.00 [838.09, 2724.97] | 1832.56 [950.00, 2800.00] | 1568.54 [752.79, 2668.00] | 0.16 | 0.01 |
| Heart rate (median [IQR]) | 89.11 [78.51, 101.47] | 90.33 [79.79, 101.00] | 87.30 [78.16, 101.75] | 0.46 | 0.04 |
| Respiratory rate (median [IQR]) | 21.65 [18.62, 24.62] | 21.50 [18.75, 24.51] | 21.69 [18.46, 24.76] | 0.7 | <0.01 |
| Mean arterial pressure (median [IQR]) | 82.52 [75.20, 89.68] | 82.78 [75.86, 91.00] | 82.02 [74.53, 88.44] | 0.36 | 0.06 |
| Albumin (median [IQR]) | 3.05 [2.67, 3.40] | 3.08 [2.69, 3.40] | 2.99 [2.62, 3.40] | 0.55 | 0.03 |
| ARDS severity (%) |  |  |  | 0.86 | 0.05 |
| Mild | 1785.77 (27.39) | 904.39 (26.82) | 881.38 (28.00) |  |  |
| Moderate | 2829.25 (43.39) | 1504.07 (44.61) | 1325.18 (42.09) |  |  |
| Severe | 1904.79 (29.22) | 963.01 (28.56) | 941.78 (29.91) |  |  |
| **Co-morbidities, n (%)** |  |  |  |  |  |
| chronic heart failure (%) | 1275.69 (19.57) | 650.45 (19.29) | 625.24 (19.86) | 0.89 | 0.01 |
| liver disease (%) | 228.62 (3.51) | 100.10 (2.97) | 128.52 (4.08) | 0.41 | 0.06 |
| renal disease (%) | 539.59 (8.28) | 293.54 (8.71) | 246.05 (7.82) | 0.71 | 0.03 |
| malignantcancer (%) | 200.78 (3.08) | 114.81 (3.41) | 85.97 (2.73) | 0.6 | 0.04 |
| Abbreviation: SMD standardized mean difference. | | | | | |

**Table S1b: Baseline Characteristics between the PSM cohort from eICU database.**

| Variables | total (n=412) | non-albumin(n=206) | albumin(n=206) | p | SMD |
| --- | --- | --- | --- | --- | --- |
| Age (median [IQR]) | 67.00 [54.00, 78.25] | 68.00 [54.00, 79.00] | 66.00 [54.00, 77.00] | 0.69 | 0.02 |
| Female (%) | 204 (49.51) | 105 (50.97) | 99 (48.06) | 0.62 | 0.06 |
| **Admission source** (%) |  |  |  | 0.08 | 0.22 |
| Medical | 326 (79.13) | 165 (80.10) | 161 (78.16) |  |  |
| Surgical urgent | 42 (10.19) | 15 (7.28) | 27 (13.11) |  |  |
| Surgical elective | 44 (10.68) | 26 (12.62) | 18 (8.74) |  |  |
| **Ethnicity (%)** |  |  |  | 0.85 | 0.11 |
| White | 292 (70.87) | 148 (71.84) | 144 (69.90) |  |  |
| Black | 35 (8.50) | 16 (7.77) | 19 (9.22) |  |  |
| Hispanic | 59 (14.32) | 27 (13.11) | 32 (15.53) |  |  |
| Other | 19 (4.61) 26 (6.31) | 11 (5.34) 15 (7.28) | 8 (3.88) 11 (5.34) |  |  |
| Weight (median [IQR]) | 76.20 [63.50, 95.85] | 75.30 [60.92, 95.95] | 77.10 [65.08, 95.40] | 0.34 | 0.09 |
| Mechanical ventilation (%) | 316 (76.70) | 161 (78.16) | 155 (75.24) | 0.56 | 0.07 |
| SOFA (median [IQR]) | 9.00 [6.00, 12.00] | 9.00 [6.00, 12.00] | 9.00 [6.00, 12.00] | 0.85 | 0.01 |
| APACHE-IVa (median [IQR]) | 80.00 [59.00, 102.00] | 80.50 [61.00, 99.00] | 79.00 [57.25, 103.75] | 0.77 | 0.03 |
| P/F (median [IQR]) | 103.01 [65.93, 168.00] | 100.00 [65.00, 157.88] | 106.00 [66.88, 174.75] | 0.58 | 0.01 |
| Urine output (median (IQR)) | 1404.00 [714.75, 2300.58] | 1437.50 [762.50, 2482.50] | 1350.00 [587.50, 2237.14] | 0.27 | 0.01 |
| Heart rate (median (IQR)) | 93.47 [83.09, 105.04] | 94.34 [83.64, 104.79] | 92.64 [82.66, 106.39] | 0.73 | 0.01 |
| Respiratory rate (median (IQR)) | 21.79 [18.61, 25.19] | 21.79 [18.56, 25.17] | 21.81 [18.94, 25.22] | 0.61 | 0.04 |
| Mean arterial pressure (median (IQR)) | 76.61 [71.79, 82.70] | 76.62 [72.55, 81.22] | 76.61 [70.91, 83.34] | 0.8 | 0.06 |
| Albumin (median (IQR)) | 2.80 [2.33, 3.10] | 2.80 [2.35, 3.10] | 2.76 [2.30, 3.10] | 0.7 | 0.01 |
| ARDS severity (%) |  |  |  | 0.74 | 0.08 |
| Mild | 74 (17.96) | 37 (17.96) | 37 (17.96) |  |  |
| Moderate | 137 (33.25) | 65 (31.55) | 72 (34.95) |  |  |
| Severe | 201 (48.79) | 104 (50.49) | 97 (47.09) |  |  |
| **Co-morbidities, n (%)** |  |  |  |  |  |
| chronic heart failure (%) | 62 (15.05) | 31 (15.05) | 31 (15.05) | >0.99 | <0.01 |
| liver disease (%) | 27 (6.55) | 14 (6.80) | 13 (6.31) | >0.99 | 0.02 |
| renal disease (%) | 36 (8.74) | 18 (8.74) | 18 (8.74) | >0.99 | <0.01 |
| malignantcancer (%) | 20 (4.85) | 12 (5.83) | 8 (3.88) | 0.49 | 0.09 |
| Abbreviation: SMD standardized mean difference.  **Table S1c: Baseline Characteristics between the IPTW cohort from MIMIC-III database.**   |  | Overall (2266.35) | non-albumin(n=1141.36) | albumin(n=1124.98) | p | | --- | --- | --- | --- | --- | | weight (median [IQR]) | 78.50 [66.43, 91.00] | 80.00 [67.63, 94.00] | 77.27 [66.02, 89.70] | 0.2 | | Gender (%) |  |  |  |  | | Female | 1283.81 (56.65) | 656.96 (57.56) | 626.85 (55.72) | 0.73 | | Male | 982.53 (43.35) | 484.40 (42.44) | 498.13 (44.28) |  | | age (median [IQR]) | 61.47 [48.44, 74.42] | 60.46 [47.57, 74.66] | 62.59 [48.59, 74.33] | 0.88 | | SOFA (median [IQR]) | 7.00 [5.00, 9.00] | 7.00 [4.00, 9.00] | 7.00 [5.00, 9.00] | 0.65 | | SAPS II (median [IQR]) | 42.00 [32.00, 52.00] | 42.00 [32.00, 52.00] | 43.00 [32.00, 52.00] | 0.99 | | **Admission source** (%) |  |  |  |  | | Medical | 1974.38 (87.12) | 988.41 (86.60) | 985.97 (87.64) | 0.81 | | Surgical urgent | 65.11 (2.87) | 38.11 (3.34) | 27.01 (2.40) |  | | Surgical elective | 226.86 (10.01) | 114.84 (10.06) | 112.01 (9.96) |  | | Ethnicity (%) |  |  |  |  | | Black | 171.72 (7.58) | 88.10 (7.72) | 83.62 (7.43) | 0.97 | | Hispanic | 67.03 (2.96) | 37.21 (3.26) | 29.82 (2.65) |  | | White | 1541.93 (68.04) | 778.99 (68.25) | 762.94 (67.82) |  | | Other | 485.67 (21.43) | 237.06 (20.77) | 248.61 (22.10) |  | | ARDS severity (%) |  |  |  |  | | Mild | 366.29 (16.16) | 194.29 (17.02) | 171.99 (15.29) | 0.71 | | Moderate | 1015.86 (44.82) | 527.84 (46.25) | 488.02 (43.38) |  | | Severe | 884.20 (39.01) | 419.23 (36.73) | 464.97 (41.33) |  | | RRT (%) | 117.60 (5.19) | 62.81 (5.50) | 54.80 (4.87) | 0.75 | | Mechanical ventilation (%) | 1976.05 (87.19) | 998.95 (87.52) | 977.11 (86.86) | 0.84 | | **Co-morbidities, n (%)** |  |  |  |  | | Chronic heart failure | 933.63 (41.20) | 473.45 (41.48) | 460.18 (40.91) | 0.91 | | Liver disease | 295.36 (13.03) | 137.72 (12.07) | 157.64 (14.01) | 0.57 | | Renal disease | 183.90 (8.11) | 93.28 (8.17) | 90.63 (8.06) | 0.95 | | Malignant cancer | 360.59 (15.91) | 208.05 (18.23) | 152.54 (13.56) | 0.13 | | P/F (median [IQR]) | 117.94 [83.00, 170.00] | 123.00 [80.30, 178.00] | 112.46 [85.00, 163.67] | 0.56 | | Heart rate (median [IQR]) | 91.37 [80.65, 103.86] | 92.83 [81.11, 104.48] | 89.98 [79.34, 103.55] | 0.45 | | Mean arterial pressure (median [IQR]) | 75.09 [70.08, 82.03] | 75.52 [69.92, 82.88] | 74.70 [70.16, 80.25] | 0.41 | | Respiratory rate (median [IQR]) | 21.21 [17.87, 24.85] | 20.87 [17.93, 24.76] | 21.39 [17.63, 25.05] | 0.61 | | Urine output (median [IQR]) | 1703.58 [963.28, 2775.00] | 1684.04 [994.77, 2610.86] | 1719.06 [924.33, 3177.87] | 0.39 | | albumin (median [IQR]) | 2.85 [2.57, 3.14] | 2.90 [2.60, 3.19] | 2.84 [2.55, 3.07] | 0.28 |   **Table S1d: Baseline Characteristics between the PSM cohort from eICU database.**   |  | Overall (n=356) | non-albumin(n=178) | albumin(n=178) | p | | --- | --- | --- | --- | --- | | weight (median [IQR]) | 76.45 [66.15, 92.08] | 76.95 [65.48, 92.40] | 76.04 [66.40, 90.95] | 0.86 | | gender (%) |  |  |  | 0.67 | | Female | 201 (56.46) | 98 (55.06) | 103 (57.87) |  | | male | 155 (43.54) | 80 (44.94) | 75 (42.13) |  | | age (median [IQR]) | 61.30 [51.26, 74.54] | 60.97 [51.12, 76.06] | 61.44 [51.42, 73.20] | 0.67 | | SOFA(median [IQR]) | 8.00 [5.00, 11.00] | 8.00 [5.00, 11.00] | 7.50 [5.00, 10.75] | 0.73 | | SAPS II (median [IQR]) | 46.00 [36.00, 56.25] | 47.00 [36.00, 57.00] | 45.00 [36.00, 55.00] | 0.44 | | **Admission source** (%) |  |  |  | 0.93 | | Medical | 295 (82.87) | 148 (83.15) | 147 (82.58) |  | | Surgical urgent | 7 (1.97) | 3 (1.69) | 4 (2.25) |  | | Surgical elective | 54 (15.17) | 27 (15.17) | 27 (15.17) |  | | ethnicity (%) |  |  |  | 0.96 | | Black | 16 (4.49) | 7 (3.93) | 9 (5.06) |  | | Hispanic | 17 (4.78) | 9 (5.06) | 8 (4.49) |  | | White | 269 (75.56) | 135 (75.84) | 134 (75.28) |  | | Other | 54 (15.17) | 27 (15.17) | 27 (15.17) |  | | ARDS severity (%) |  |  |  | 0.75 | | Mild | 57 (16.01) | 30 (16.85) | 27 (15.17) |  | | Moderate | 142 (39.89) | 73 (41.01) | 69 (38.76) |  | | Severe | 157 (44.10) | 75 (42.13) | 82 (46.07) |  | | RRT (%) | 24 (6.74) | 13 (7.30) | 11 (6.18) | 0.83 | | Mechanical ventilation (%) | 298 (83.71) | 150 (84.27) | 148 (83.15) | 0.89 | | **Co-morbidities, n (%)** |  |  |  |  | | Chronic heart failure | 110 (30.90) | 56 (31.46) | 54 (30.34) | 0.91 | | Liver disease | 44 (12.36) | 23 (12.92) | 21 (11.80) | 0.87 | | Renal disease | 66 (18.54) | 30 (16.85) | 36 (20.22) | 0.5 | | Malignant cancer | 72 (20.22) | 36 (20.22) | 36 (20.22) | 1 | | P/F (median [IQR]) | 108.45 [75.00, 165.25] | 111.83 [75.00, 169.64] | 104.50 [77.12, 160.00] | 0.71 | | Heart rate (median [IQR]) | 96.07 [84.54, 107.57] | 95.94 [84.69, 107.16] | 96.56 [84.09, 107.94] | 0.85 | | Mean arterial pressure (median (IQR)) | 73.46 [67.74, 79.17] | 72.93 [67.31, 79.79] | 73.98 [68.42, 79.08] | 0.34 | | Respiratory rate (median [IQR]) | 21.04 [17.88, 24.86] | 20.86 [17.99, 25.17] | 21.24 [17.50, 24.77] | 0.99 | | Urine output (median [IQR]) | 1300.00 [772.25, 2251.75] | 1325.78 [768.25, 2346.25] | 1229.00 [775.00, 2202.96] | 0.7 | | albumin (median [IQR]) | 2.72 [2.43, 2.99] | 2.71 [2.40, 3.00] | 2.73 [2.44, 2.97] | >0.99 |   **Table S2a Comparison of the outcomes in eICU database.**   |  | Overall | Non-albumin | Albumin | P | | --- | --- | --- | --- | --- | | 28-day mortality | 128 (31.07) | 67 (32.5) | 61 (29.6) | 0.60 | | ICU mortality (%) | 106 (25.73) | 54 (26.21) | 52 (25.24) | 0.91 | | Hospital mortality (%) | 132 (32.04) | 68 (33.01) | 64 (31.07) | 0.75 | | Length of hospital stay (median [IQR]) | 8.75 [5.21, 14.81] | 8.25 [4.64, 13.17] | 8.98 [5.81, 16.02] | 0.02 | | Length of ICU stay (median [IQR]) | 3.50 [1.87, 7.44] | 3.20 [1.80, 6.65] | 3.57 [1.89, 8.19] | 0.51 | | Mechanical ventilation duration (median [IQR]) | 29.50 [5.00, 92.00] | 33.50 [6.25, 104.50] | 28.50 [4.00, 87.00] | 0.29 | | | | | | |

**Table S2b Comparison of the outcomes in MIMIC-III database.**

|  | Overall | Non-albumin | Albumin | P |
| --- | --- | --- | --- | --- |
| 28-day mortality (%) | 111 (31.18) | 55 (30.90) | 56 (31.46) | >0.99 |
| ICU mortality (%) | 118 (33.15) | 51 (28.65) | 67 (37.64) | 0.09 |
| Hospital mortality (%) | 119 (33.43) | 51 (28.65) | 68 (38.20) | 0.07 |
| 90-day mortality (%) | 142 (39.89) | 63 (35.39) | 79 (44.38) | 0.1 |
| 365-day mortality (%) | 171 (48.03) | 80 (44.94) | 91 (51.12) | 0.29 |
| Length of hospital stay (median [IQR]) | 17.34 [9.06, 27.60] | 14.34 [7.24, 21.99] | 21.73 [12.72, 31.69] | <0.01 |
| Length of ICU stay (median [IQR]) | 9.28 [4.93, 15.90] | 7.03 [4.06, 13.67] | 11.57 [6.12, 20.82] | <0.01 |
| Mechanical ventilation duration (median [IQR]) | 5.63 [2.16, 11.89] | 4.05 [1.54, 7.73] | 8.36 [3.54, 16.53] | <0.01 |

| **Table S3a Univariate COX regression analysis in eICU cohort** | | | |
| --- | --- | --- | --- |
| Characteristics | HR | p | 95% CI |
| weight | 0.77 | 0.003 | 0.65 - 0.92 |
| age | 1.45 | <0.01 | 1.23 - 1.72 |
| SOFA | 2.67 | <0.01 | 2.23 - 3.21 |
| APACHE-IVa | 4.15 | <0.01 | 3.39 - 5.08 |
| gender | 1.17 | 0.074 | 0.99 - 1.38 |
| ethnicity | 1.03 | 0.409 | 0.96 - 1.11 |
| Admission source | 1.05 | 0.57 | 0.9 - 1.22 |
| ARDS severity | 1.8 | <0.01 | 1.6 - 2.03 |
| Chronic heart failure | 0.81 | 0.071 | 0.65 - 1.02 |
| Liver disease | 2.59 | <0.01 | 1.85 - 3.64 |
| Renal disease | 1.44 | 0.007 | 1.11 - 1.86 |
| Malignant cancer | 3.22 | <0.01 | 2.4 - 4.32 |
| P/F | 0.49 | <0.01 | 0.41 - 0.59 |
| Urine output | 0.48 | <0.01 | 0.39 - 0.58 |
| Heart rate | 1.44 | <0.01 | 1.21 - 1.71 |
| Respiratory rate | 1.44 | <0.01 | 1.21 - 1.72 |
| Mean arterial pressure | 0.5 | <0.01 | 0.41 - 0.6 |
| albumin | 0.38 | <0.01 | 0.31 - 0.47 |

Abbreviations: HR: hazard ratio; CI: confidence interval.

**Table S3b Univariate COX regression analysis in MIMIC-III cohort**

| HR | HI | P-value | 95%CI |
| --- | --- | --- | --- |
| weight | 0.73 | 0.007 | 0.58 - 0.92 |
| age | 1.73 | <0.01 | 1.38 - 2.18 |
| gender | 0.99 | 0.963 | 0.79 - 1.25 |
| SOFA | 2.17 | <0.01 | 1.73 - 2.71 |
| SAPS II | 2.91 | <0.01 | 2.27 - 3.72 |
| Admission source | 0.41 | 0.001 | 0.25 - 0.69 |
| ethnicity | 0.9 | 0.768 | 0.43 - 1.86 |
| ARDS severity | 1.61 | 0.006 | 1.14 - 2.26 |
| RRT | 1.36 | 0.173 | 0.87 - 2.12 |
| Mechanical ventilation | 0.58 | <0.01 | 0.44 - 0.77 |
| P/F | 0.71 | 0.003 | 0.57 - 0.89 |
| Chronic heart failure | 1.23 | 0.068 | 0.99 - 1.54 |
| Liver disease | 1.64 | 0.001 | 1.22 - 2.21 |
| Renal disease | 1.68 | 0.003 | 1.19 - 2.37 |
| Malignant cancer | 2.55 | <0.01 | 2.01 - 3.23 |
| Heart rate | 1.25 | 0.048 | 1 - 1.57 |
| Mean arterial pressure | 0.57 | <0.01 | 0.45 - 0.72 |
| Respiratory rate | 1.63 | <0.01 | 1.3 - 2.05 |
| albumin | 0.61 | 0.001 | 0.45 - 0.82 |
| Urine output | 0.44 | <0.01 | 0.35 - 0.56 |

Abbreviations: HR: hazard ratio; CI: confidence interval.

**Table S4a. The association between albumin use and 28-day mortality in subgroups of eICU**

| Characteristics | Total（Death） | HR（95%CI） | P-value |
| --- | --- | --- | --- |
| Age |  |  |  |
| >65 | 233（70） | 0.74（0.46-1.19） | 0.2 |
| <=65 | 179（58） | 1.06（0.63-1.78） | 0.8 |
| SOFA |  |  |  |
| >=9 | 218（93） | 1.00（0.67-1.50） | >0.99 |
| <9 | 194（35） | 0.68（0.35-1.33） | 0.3 |
| APACHE-IVa |  |  |  |
| >=80 | 209（95） | 0.90（0.60-1.34） | 0.6 |
| <80 | 203（33） | 0.88（0.44-1.74） | 0.7 |
| Severity of ARDS |  |  |  |
| Mild | 74（12） | 0.67（0.21-2.12） | 0.5 |
| Moderate | 137（32） | 1.18（0.59-2.37） | 0.6 |
| Severe | 201（84） | 0.83（0.54-1.28） | 0.4 |
| Heart rate |  |  |  |
| >=100 | 149（62） | 0.94（0.57-1.55） | 0.8 |
| <100 | 263（6） | 0.78（0.48-1.27） | 0.3 |
| Mean arterial pressure |  |  |  |
| >=75 | 235（65） | 0.96（0.59-1.57） | 0.9 |
| <75 | 177（63） | 0.78（0.48-1.28） | 0.3 |
| Urine output |  |  |  |
| >=1500 | 200（46） | 1.02（0.57-1.82） | >0.99 |
| <1500 | 212（82） | 0.78（0.51-1.21） | 0.3 |
| Respiratory rate |  |  |  |
| >= 20 | 273（97） | 0.92（0.62-1.38） | 0.7 |
| <20 | 139（31） | 0.73（0.36-1.48） | 0.4 |
| Albumin |  |  |  |
| >= 3 | 134（21） | 1.47（0.62-3.60） | 0.4 |
| <3 | 278（107） | 0.75（0.51-1.10） | 0.1 |

Abbreviations: HR: hazard ratio; CI: confidence interval.

**Table S4b. The association between albumin use and 28-day mortality in subgroups of MIMIC-III**

| Characteristics | Total（Death） | HR（95%CI） | P-value |
| --- | --- | --- | --- |
| Age |  |  |  |
| >65 | 143（57） | 0.76（0.45-1.28） | 0.3 |
| <=65 | 213（54） | 1.19（0.69-2.03） | 0.5 |
| SOFA |  |  |  |
| >=7 | 220（83） | 0.96（0.63-1.48） | 0.9 |
| <7 | 136（28） | 0.92（0.44-1.93） | 0.8 |
| SAPS II |  |  |  |
| >=43 | 209（89） | 1.01（0.67-1.53） | >0.99 |
| <43 | 147（22） | 0.76（0.33-1.76） | 0.5 |
| Severity of ARDS |  |  |  |
| Mild | 57（15） | 2.31（0.79-6.77） | 0.1 |
| Moderate | 142（40） | 0.72（0.38-1.34） | 0.3 |
| Severe | 157（56） | 0.90（0.54-1.53） | 0.7 |
| Heart rate |  |  |  |
| >=100 | 149（50） | 0.68（0.39-1.19） | 0.2 |
| <100 | 207（61） | 1.22（0.74-2.02） | 0.4 |
| Mean blood pressure |  |  |  |
| >=75 | 154（38） | 0.97（0.51-1.82） | 0.9 |
| <75 | 202（73） | 0.93（0.59-1.47） | 0.8 |
| Urine output |  |  |  |
| >=1500 | 155（36） | 1.43（0.74-2.75） | 0.3 |
| <1500 | 201（75） | 0.73（0.46-1.14） | 0.2 |
| Respiratory rate |  |  |  |
| >= 20 | 208（76） | 0.81（0.52-1.27） | 0.4 |
| <20 | 148（35） | 1.25（0.64-2.43） | 0.5 |
| Albumin |  |  |  |
| >= 3 | 88（16） | 2.75（0.96-7.92） | 0.06 |
| <3 | 268（95） | 0.76（0.51-1.14） | 0.2 |

Abbreviations: HR: hazard ratio; CI: confidence interval.
